# Supplementary material for: Accurate three-dimensional tracking method in bistatic forward scatter radar
Source: Springer Nature journal article supplement (doi:10.1186/1687-6180-2013-66), 2013-04-02

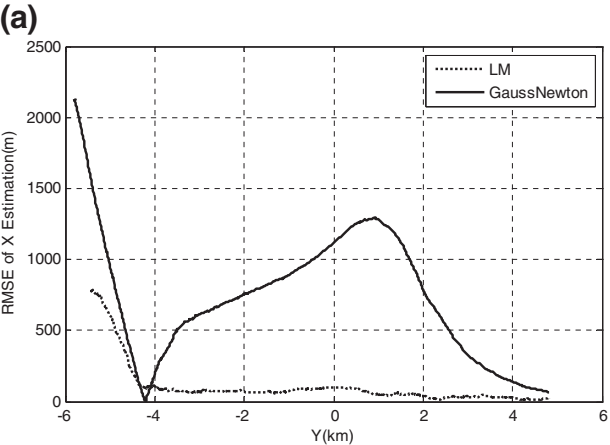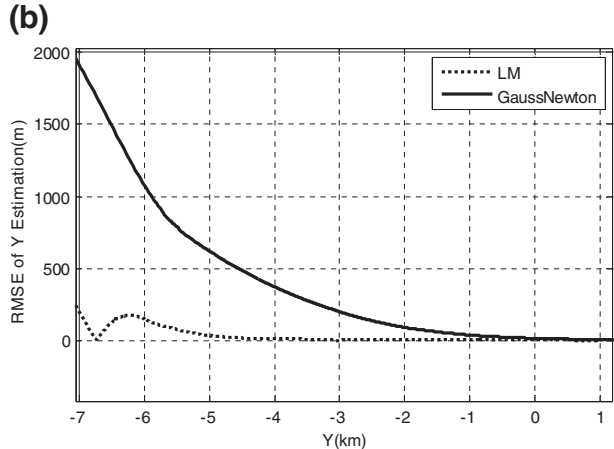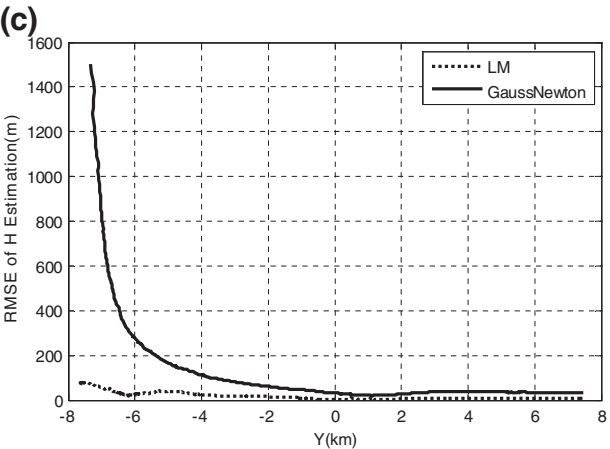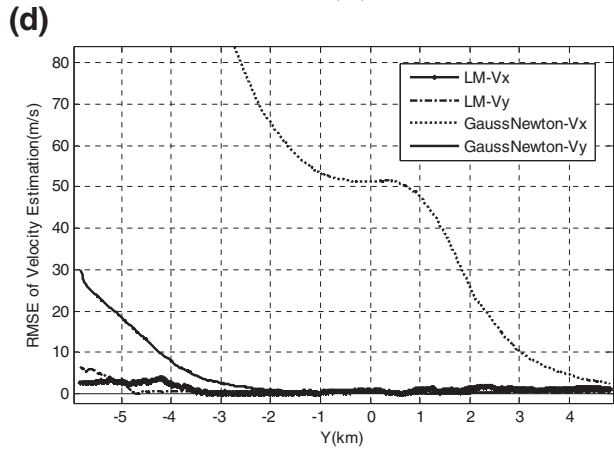

Supplement: 13634_2012_442_MOESM3_ESM.pdf [file 13634_2012_442_MOESM3_ESM.pdf]
